# Supplementary material
Source: Springer Nature journal article supplement (https://www.springermedizin.de/resource/supplementary/13023_2013_725_MOESM3_ESM.pdf/9642954)

**a**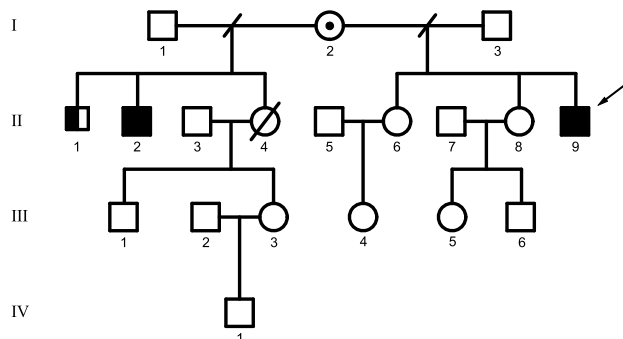**b**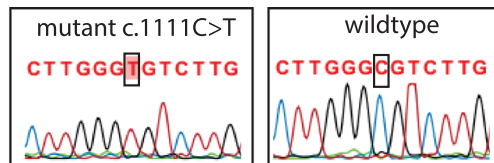**c**

|               |           |     |           |    |    |           |
|---------------|-----------|-----|-----------|----|----|-----------|
| Human         | AT        | SGL | <b>GR</b> | LV | SG | HI        |
| Rhesus Monkey | AT        | SGL | <b>GR</b> | LV | SG | HI        |
| Mouse         | AT        | SGL | <b>GR</b> | LV | SG | HI        |
| Chicken       | <b>GM</b> | SGL | <b>GR</b> | LI | SG | <b>RT</b> |
| Zebrafish     | <b>AS</b> | GV  | <b>GR</b> | LL | FG | <b>KI</b> |

**e**

mutant c.990\_991insGCTGC

wildtype

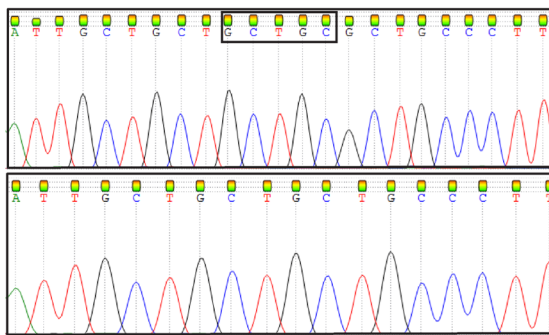**d**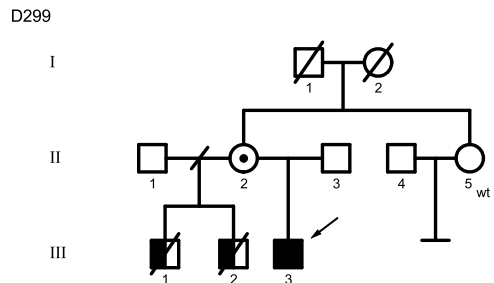

Supplement: MOESM3 [file 9642954]
